# Supplementary material
Source: publisher site journal article supplement (https://www.degruyterbrill.com/publication/isbn/9783486718140/downloadAsset/9783486718140_Buchinformation.pdf)
Supplement: Supplementary file 1 [file 9783486718140_Buchinformation.pdf]

Oldenbourg Wissenschaftsverlag  
Pressereferat Geisteswissenschaften  
Rosenheimer Str. 145  
81671 München  
Telefon: 089/45051-211  
Fax: 089/45051-266  
presse-w@verlag.oldenbourg.de

## **Akten zur Auswärtigen Politik der Bundesrepublik Deutschland 1973**

Herausgegeben im Auftrag des Auswärtigen Amts vom Institut für Zeitgeschichte. Hauptherausgeber Hans-Peter Schwarz, Mitherausgeber Helga Haftendorn, Klaus Hildebrand, Werner Link, Horst Möller und Rudolf Morsey

Bearbeitet von Matthias Peter, Michael Kieninger, Michael Ploetz, Mechthild Lindemann und Fabian Hilfrich  
Wissenschaftliche Leiterin: Ilse Dorothee Pautsch

2004. 3 Bände, LXXXVI, 2.215 S., € 188,-  
(Fortsetzungspreis € 138,-)  
ISBN 3-486-56651-2

1973 konnten die Bemühungen Bonns um eine Regelung der Beziehungen zu den östlichen Nachbarn durch Verträge mit der ČSSR, Bulgarien und Ungarn erfolgreich abgeschlossen werden. Gleichzeitig begann für die Bundesrepublik durch den Beitritt zur UNO und die Teilnahme an der KSZE eine neue Phase der Multilateralisierung ihrer Außenpolitik. Weitere thematische Schwerpunkte der 426 erstmals veröffentlichten Dokumente sind die MBFR-Verhandlungen in Wien, der Besuch von Leonid Breschnew in Bonn und der Vorschlag Henry Kissingers, im Rahmen eines „Year of Europe“ die westliche Wertegemeinschaft in einer transatlantischen Erklärung zu bekräftigen. Der Jom-Kippur-Krieg im Oktober und die sich anschließende Ölkrise zeigten die Grenzen der Entspannung auf und stellten die europäischen Staaten vor neue Herausforderungen.

## **Zur Edition:**

- Die Edition erscheint seit 1993 jährlich in zwei bis drei Bänden.
- Veröffentlicht wird bisher unzugängliches Material nach Ablauf der Sperrfrist von 30 Jahren, darunter auch Bestände, die als „geheim“ oder „streng geheim“ klassifiziert waren. Das Herausbergremium trägt in wissenschaftlicher Unabhängigkeit die Verantwortung für Auswahl und Kommentierung der Akten. Die Edition unterscheidet sich dadurch maßgeblich von vergleichbaren Projekten in anderen Ländern.
- Die Dokumente sind in chronologischer Reihenfolge abgedruckt. Die Register des Dokumentenverzeichnisses, eine Zeittafel, die Personen- und Sachregister vereinfachen die Benutzung des Werkes. Aus der Kommentierung geht u.a. hervor, welche Beachtung das jeweils edierte Dokument auf den verschiedenen Entscheidungsebenen des Auswärtigen Amts bzw. außerhalb dieser Behörde gefunden hat.
